# Supplementary material
Source: PubMed Central journal article supplement (PMC4936572)
Supplement: supp_pp.16.00395_PP2016-00395DR1_Supplemental_Material.pdf [file supp_pp.16.00395_PP2016-00395DR1_Supplemental_Material.pdf]

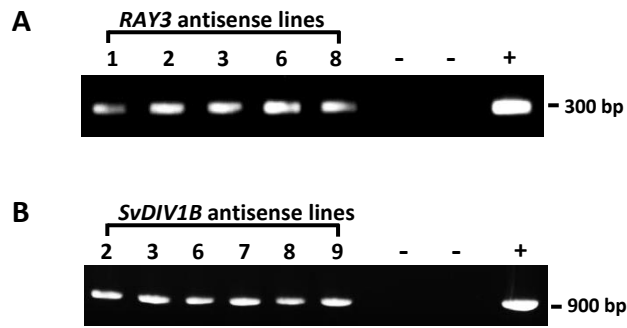

**Supplementary Figure 1.** PCR amplification of *RAY3* and *SvDIV1B* transgenes. A, *RAY3* antisense lines (1, 2, 3, 6 and 8) showed the presence of the *RAY3* transgene. No amplification was detected in either of the two wild-type non-transformed controls (-). *RAY3* antisense construct amplification (+) showed a 300 bp positive band, as expected. B, *SvDIV1B* antisense lines (2, 3, 6, 7, 8 and 9) showed the presence of the *SvDIV1B* transgene. No amplification was detected in either of the two wild-type non-transformed controls (-). *SvDIV1B* antisense construct amplification (+) showed a 900 bp positive band, as expected.

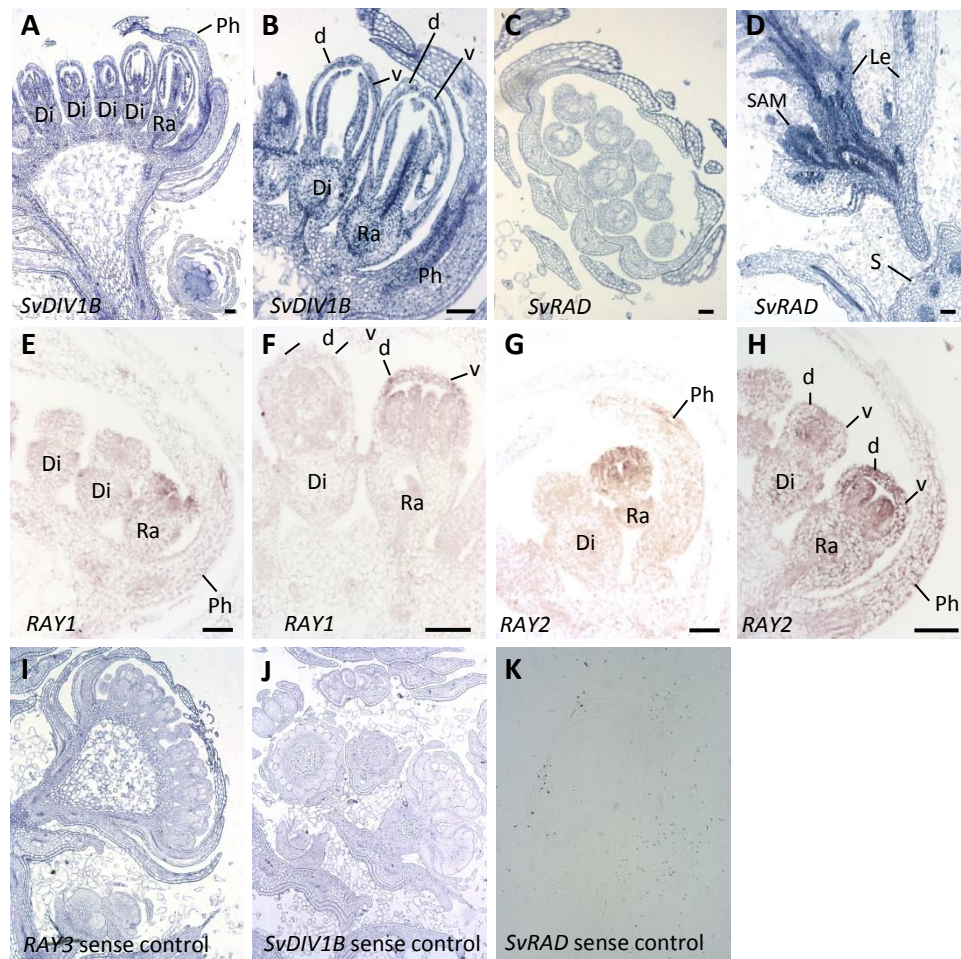

**Supplementary Figure 2.** *In situ* hybridization showing the expression pattern of *SvDIV1B* (A, B), *SvRAD* (C, D), *RAY1* (E, F) and *RAY2* (G, H) in the *S. vulgaris*. During later capitulum development (stage 6-7), *DIV1B* (A, B) was expressed ubiquitously in ray and disc florets, whereas *SvRAD* (C, D) was expressed in the vegetative tissues including the vasculature. *RAY1* and *RAY2* were expressed in both dorsal and ventral petals of ray florets (E, G: stage4 and F, H: stage 5). *In situ* sense controls (I-K). Di, disc florets; Ra, ray florets; Ph, phyllaries; Le , leaf; S, stem; SAM, shoot apical meristem; d, dorsal petal and v, ventral petal. Scale bars are 100 μm.

| <b>Degenerative primers</b>        | <b>Sequences (5'-3')</b>                      |
|------------------------------------|-----------------------------------------------|
| DeDIVForw-1                        | CCNGGNAARACNGTNKNGAYGTNAT                     |
| DeDIVRev-1                         | RAARTAYTTYTGNGCRTGNSWNGCNACYTG                |
| DeDIVRev-2                         | CCATACTTRTTWAGCCCSAGCAAAAATTGCCTG             |
| DeCYC-1                            | AGCAAAACCCTWGATTGGCT                          |
| DeCYC-2                            | YCTTTCYCKAGCTCTTGCTC                          |
| DeRADForw                          | AIAACRARIISTTYGARMRR                          |
| DeRADRev                           | YTGTAIKYKGGSAIIGGIAC                          |
| G775                               | GACTCGGAGTCGACATCGA(T) <sub>17</sub>          |
| G873                               | ATGCTIGGI TTRGARAAYCCIAGRAAYACI CTIGARTGG     |
| <b>Specific primers</b>            |                                               |
| SvDIV1BF                           | GCGTGCGTGGCTACTTGAGTAG                        |
| SvDIV1BR                           | TGAGTATCATTGTAGCACTTCTCCTTTAC                 |
| 35SForw                            | CGACAATCCCCTATCCTT                            |
| <b>Antisense construct primers</b> |                                               |
| SvDIV1B-5'SacI                     | <u>CGAGCTCGT</u> GAGTATCATTGTAGCACTTCTCCTTTAC |
| SvDIV1B-3'XbaI                     | <u>GCTCTAGAGCG</u> CGTGGCTACTTGAGTAG          |
| RAY3-5'SacI                        | <u>CGAGCTCGG</u> ATTGGCTTCTTACCAAGTCCC        |
| RAY3-3'XbaI                        | <u>GCTCTAGAGC</u> CTTGAATTAACCCAGCCTTGCTG     |
| <b>qRT-PCR primers</b>             |                                               |
| qSvDIV1BF                          | GCTCTTCTTCAGTCCAAGGAACA                       |
| qSvDIV1BR                          | GTCTATTGTGCGGAGGGAAG                          |
| qSvRADF                            | AATCGGCAGAAGAAGTGAAGAGG                       |
| qSvRADR                            | TATTGCATTACCTCATGGTTGGCAA                     |
| qRAY1F                             | CAGGATCAACTTAGTAAAGATTCAGGG                   |
| qRAY1R                             | GCAAGATCCACACGGCTCAAG                         |
| qRAY2F                             | GACCCCGGCGATTGTCTTC                           |
| qRAY2R                             | CCATAGTCCCAAGAAAGATCATCATAG                   |
| qRAY3F                             | GGCTTCTTACCAAGTCCCTTAC                        |
| qRAY3R                             | GATGTCCCCTTAATGCTTTCCAG                       |

**Supplementary Table 1.** Primer sequences used for cloning genes, making constructs and expression analysis. Restriction enzyme sites are underlined.
